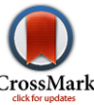

# A Mur Regulator Protein in the Extremophilic Bacterium *Deinococcus radiodurans*

Amir Miraj Ul Hussain Shah<sup>1,3</sup>, Ye Zhao<sup>1,3</sup>, Yunfei Wang<sup>1</sup>, Guoquan Yan<sup>3</sup>, Qikun Zhang<sup>3</sup>, Liangyan Wang<sup>1</sup>, Bing Tian<sup>1</sup>, Huan Chen<sup>2,3\*</sup>, Yuejin Hua<sup>1\*</sup>

**1** Key Laboratory of Chinese Ministry of Agriculture for Nuclear-Agricultural Sciences, Institute of Nuclear-Agricultural Sciences, Zhejiang University, Hangzhou, China, **2** Key Laboratory of Laboratory Medicine, Ministry of Education, Zhejiang Provincial Key Laboratory of Medical Genetics, School of Laboratory Medicine & Life Science, Wenzhou Medical College, Wenzhou, China, **3** Laboratory of Microbiology and Genomics, Zhejiang Institute of Microbiology, Hangzhou, China

## Abstract

Ferric uptake regulator (Fur) is a transcriptional regulator that controls the expression of genes involved in the uptake of iron and manganese, as well as vital nutrients, and is essential for intracellular redox cycling. We identified a unique Fur homolog (DR0865) from *Deinococcus radiodurans*, which is known for its extreme resistance to radiation and oxidants. A *dr0865* mutant (Mt-0865) showed a higher sensitivity to manganese stress, hydrogen peroxide, gamma irradiation and ultraviolet (UV) irradiation than the wild-type R1 strain. Cellular manganese (Mn) ion ( $Mn^{2+}$ ) analysis showed that  $Mn^{2+}$ , copper ( $Cu^{2+}$ ), and ferric ( $Fe^{3+}$ ) ions accumulated significantly in the mutant, which suggests that the *dr0865* gene is not only involved in the regulation of  $Mn^{2+}$  homeostasis, but also affects the uptake of other ions. In addition, transcriptome profiles under  $MnCl_2$  stress showed that the expression of many genes involved in Mn metabolism was significantly different in the wild-type R1 and DR0865 mutant (Mt-0865). Furthermore, we found that the *dr0865* gene serves as a positive regulator of the manganese efflux pump gene *mntE* (*dr1236*), and as a negative regulator of Mn ABC transporter genes, such as *dr2283*, *dr2284* and *dr2523*. Therefore, it plays an important role in maintaining the homeostasis of intracellular Mn (II), and also other  $Mn^{2+}$ , zinc ( $Zn^{2+}$ ) and  $Cu^{2+}$  ions. Based on its role in manganese homeostasis, DR0865 likely belongs to the Mur sub-family of Fur homolog.

**Citation:** Ul Hussain Shah AM, Zhao Y, Wang Y, Yan G, Zhang Q, et al. (2014) A Mur Regulator Protein in the Extremophilic Bacterium *Deinococcus radiodurans*. PLoS ONE 9(9): e106341. doi:10.1371/journal.pone.0106341

**Editor:** Christophe Herman, Baylor College of Medicine, United States of America

**Received:** April 11, 2014; **Accepted:** July 29, 2014; **Published:** September 22, 2014

**Copyright:** © 2014 Ul Hussain Shah et al. This is an open-access article distributed under the terms of the Creative Commons Attribution License, which permits unrestricted use, distribution, and reproduction in any medium, provided the original author and source are credited.

**Funding:** This work was supported by grants from National Natural Science Foundation of China (31100058, 31210103904, 31370102), and a major project for genetically modified organisms breeding from the Ministry of Agriculture of China (2014ZX08009-003-002), a grant from Special Fund for Agro-scientific Research in the Public Interest from the Ministry of Agriculture of China (201103007), a Program for New Century Excellent Talents in University (NCET-10-0739), the Natural Science Foundation and Educational Commission of Zhejiang Province (LY13C010001, Y2013Z9892), a project of the Science and Technology Department of Zhejiang Province of China (2013F20011, 2014F50012, 2014F30033), the Fundamental Research Funds for the Central Universities from Zhejiang University (2013QNA6015), and Key Innovation Team Program of Zhejiang Province (2010R50033). The funders had no role in study design, data collection and analysis, decision to publish, or preparation of the manuscript.

**Competing Interests:** The authors have declared that no competing interests exist.

\* Email: yjhua@zju.edu.cn (YH); chenhuan7809@gmail.com (HC)

† These authors contributed equally to this work.

## Introduction

Metal ions, such as manganese ( $Mn^{2+}$ ) and iron ( $Fe^{2+}$ ), are essential micronutrients for many microorganisms and act as enzyme cofactors for a wide range of proteins in processes such as DNA synthesis, DNA repair, reactive oxygen species (ROS) scavenging and electron transport [1]. However, when in excess, they are toxic to cells. Excess iron induces the over-production of harmful ROS, such as super-oxide anion radicals ( $O_2^-$ ) and hydrogen peroxide ( $H_2O_2$ ) [1]. High levels of ROS may target DNA, RNA, proteins and lipids through the hydroxyl radicals ( $HO\bullet$ ) that are generated from  $H_2O_2$  in the Fenton reaction, which uses divalent ions [2]. Inhibition of RNA and protein synthesis occur when high intracellular levels of manganese are reached [3]. Therefore, microorganisms have evolved efficient mechanisms to maintain metal ion homeostasis [4].

The uptake of metal ions is controlled by the ferric uptake regulator (Fur) or the *Diphtheria* toxin repressor (DtxR) family of proteins [5]. The Fur superfamily comprises different proteins with

distinct regulatory roles [6]. Fur and Zur (zinc uptake regulator) [7], which respond to iron ( $Fe^{2+}$ ) or zinc ( $Zn^{2+}$ ), respectively, repress, the expression of genes involved in  $Fe^{2+}$  or  $Zn^{2+}$  uptake. The PerR protein, which has been found in Gram-positive bacteria such as *Bacillus* and *Staphylococcus*, regulates several genes that are involved in the oxidative stress response [8,9]. Another Fur homolog, named Irr, which can repress the heme biosynthesis pathway, was first found in *Bradyrhizobium japonicum* [10,11]. In 2004, Johnston's group identified a new *fur*-like protein named Mur (manganese uptake regulator) in *Rhizobium leguminosarum*. This protein represses the transcription of the *sitABCD* genes in response to  $Mn^{2+}$  [12].

*Deinococcus radiodurans* is a well-known bacterium that has extraordinary resistance to ionizing radiation (IR), ultraviolet radiation (UV), various DNA-damaging agents, oxidative stress and desiccation [13]. Ionizing radiation can directly damage biomacromolecules and also produces ROS, which can attack both proteins and DNA [14]. Recently, it has been shown that *D. radiodurans* has a special Mn/Fe regulatory system, which

accumulates exceptionally high levels of intracellular  $Mn^{2+}$  and low levels of  $Fe^{2+}$ .  $Mn^{2+}$  may act as an antioxidant to strengthen or support the antioxidant enzyme system, which protects the bacteria from oxidative stress [15,16]. It was shown that there are three types of  $Mn^{2+}$ -dependent transport genes in *D. radiodurans*: *dr1236* ( $Mn^{2+}$  efflux genes) [17], *dr1709* (Nramp family transporters) and three ATP-dependent transporters (*dr2283*, *dr2284* and *dr2523*). The genes that are involved in  $Fe^{2+}$ -dependent transport encode an ABC-type hemin transporter (*drb0016*), an ABC-type Fe(III)-siderophore transporter (*drb0017*), two Fe(II) transporters (*dr1219*, *dr1220*) and two DNA protection proteins (Dps) (*dr2263*, *drb0092*) [1]. Furthermore, *D. radiodurans* also has three oxidation-related regulators: OxyR (DR0615), DtxR (DR2539), and a Fur homolog (DR0865) [1]. The DR0615 protein is both a transcriptional activator of the *katE* and *drb0125* genes and a transcriptional repressor of the *dps* and *mntH* genes [18]. The DR2539 protein acts as a negative regulator of a  $Mn^{2+}$  transporter gene (*dr2283*) and as a positive regulator of  $Fe^{2+}$ -dependent transporter genes (*dr1219* and *drb0125*) [19]. However, the function of the Fur homolog (DR0865) is still unknown.

In this study, we aimed to elucidate the function of the Fur homolog (DR0865) and demonstrate its role in maintaining the homeostasis of intracellular Mn. The results showed that DR0865 is not only a Mur protein, but is also vital for the homeostasis of intracellular  $Mn^{2+}$ ,  $Zn^{2+}$  and  $Cu^{2+}$  ions.

## Results

### *D. radiodurans* gene encodes a putative Fur family protein

There is a potential *fur* homolog (*dr0865*), which encodes a protein that contains 132 amino acids, in *D. radiodurans* genome. A BLASTP analysis showed that DR0865 exhibits 24% identity to *Helicobacter pylori* Fur (Hpy-Fur) and 26% identity to the *E. coli* Fur protein. Further comparison with the Hpy-Fur sequence showed that DR0865 has three similar metal-binding domains. Domain I consists of amino acid residues C82, C85, C121 and C124, domain II comprises the residues E70, H77 and H79 and domain III is formed from residues H76, H92, T97, H113 and H78 (Figure S1 in File S1). The predicted structure of DR0865 is based on the crystal structure of Hpy-Fur (Figure 1). Previous data showed that  $ZnS_4$  binding by domain I stabilizes  $\beta 3$ - $\beta 4$ - $\beta 5$  structures. Domain II is a metal sensing site, which can regulate DNA binding ability in response to changes in metal concentrations. Domain III is not necessary for DNA binding, however, mutation of this domain reduces the DNA binding ability [20].

### The absence of *dr0865* inhibits cell growth

To confirm the specific roles of DR0865 in *D. radiodurans*, the null mutant of *dr0865* (Mt-0865) and the complemented strain (C-0865) were constructed. The coding region of the *dr0865* gene was replaced with a kanamycin resistance cassette under a constitutively expressed *D. radiodurans* *groEL* promoter (Figure S2 in File S1). As shown in Figure 2, the cell growth of Mt-0865 was approximately two-fold lower than that of the wild type strain at 30°C, whereas the growth rate of the complemented strain C-0865 was similar to that of the wild-type strain. This result indicates that the *dr0865* gene is necessary for cell growth and other metabolic activities.

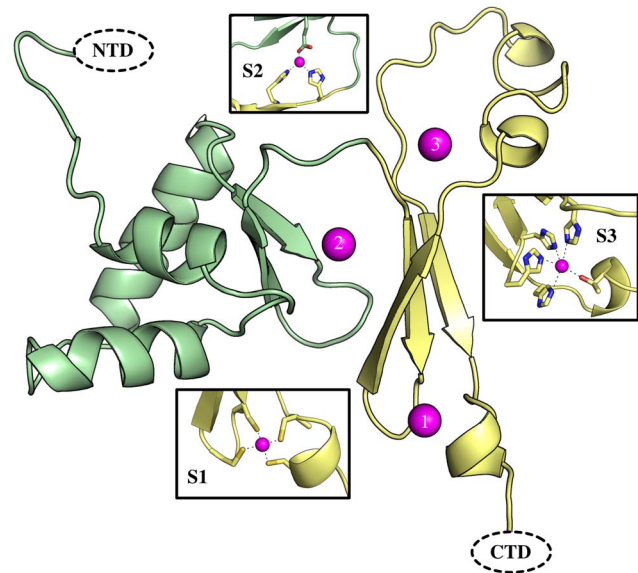

**Figure 1. The predicted structure of DR0865 was obtained from homology modeling (Swiss-model) using Hpy-Fur PDB: 2XIG as starting model.**

doi:10.1371/journal.pone.0106341.g001

### Loss of *dr0865* causes Mn (II) ion sensitivity in *D. radiodurans*

To test whether the growth inhibition was caused by a disruption of ion homeostasis, a metal ion sensitivity assay was carried out as described previously [17]. As shown in Figure 3 and Figure S3 in File S1, the growth of Mt-0865 was strongly inhibited by  $Mn^{2+}$  but not by the presence of other metal ions. The C-0865 showed the same growth phenotype as the wild-type R1 strain, which indicates that mutation of the *dr0865* gene disrupts  $Mn^{2+}$  homeostasis.

To further confirm the Mn sensitivity of Mt-0865, we measured the effect of various concentrations of  $Mn^{2+}$  on the growth of Mt-0865 (Figure 4). In comparison with the wild-type R1 strain, the

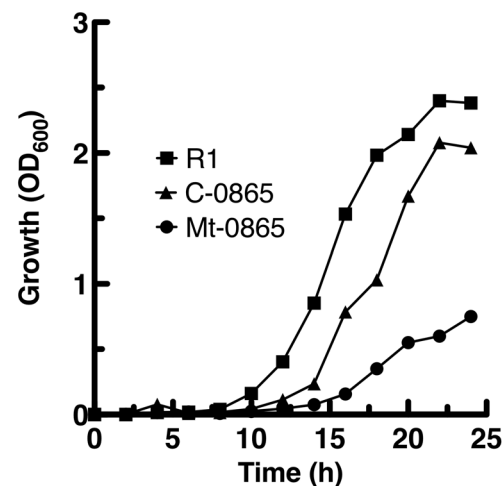

**Figure 2. Growth curves of the wild-type R1 strain (black square), complement C-0865 strain (black triangle) and Mt-0865 strain (black circle).** Data represent the mean  $\pm$  standard deviation of three independent experiments.

doi:10.1371/journal.pone.0106341.g002

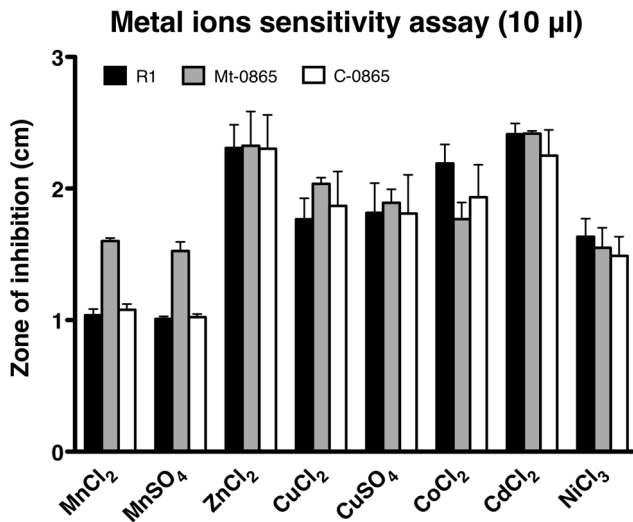

**Figure 3. The zone of inhibition of the wild-type R1 (black bar), Mt-0865 (gray bar) and C-0865 strains (white bar) respectively, under various cations stress.** Strains were cultured in TGY plates, overlaid with filter discs saturated with 1 M solution of various cations. The zone of inhibition was measured from the edge of the disc after 3 days. Data represent the means  $\pm$  standard deviation of three independent experiments. doi:10.1371/journal.pone.0106341.g003

growth of Mt-0865 was inhibited in the presence of low concentrations of Mn<sup>2+</sup> in TGY medium. When the Mn<sup>2+</sup> concentration was increased, the growth defect phenotype became more pronounced. An analogous was observed in previous studies, in which the growth of a *Streptococcus pneumoniae* mutant with a disrupted calcium efflux system was more severely inhibited at higher calcium concentrations [21]. Therefore, we inferred that the Mt-0865 strain may either have a higher rate of Mn<sup>2+</sup> uptake or is unable to efficiently remove excess Mn<sup>2+</sup>.

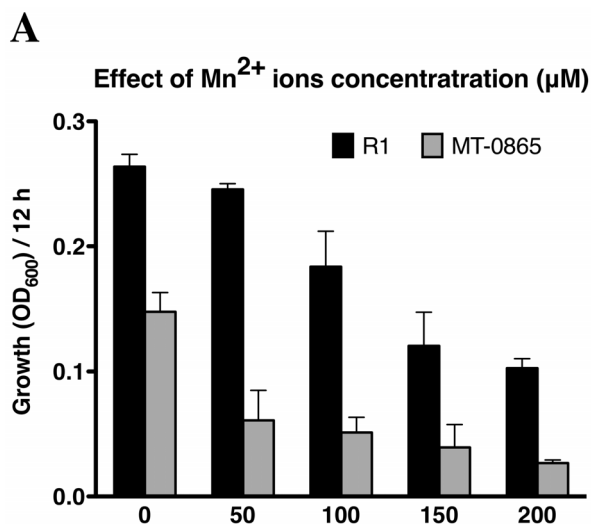

### The effect of H<sub>2</sub>O<sub>2</sub>, UV and gamma irradiation on the survival of Mt-0865

The response of the Fur regulator to oxidative stress is very complicated in some microorganisms [5]. Because the Mt-0865 strain exhibits a growth defect and is sensitive to Mn stress, we further investigated the sensitivity of Mt-0865 to H<sub>2</sub>O<sub>2</sub>, UV and gamma irradiation. First, the survival of these strains was measured under oxidative stress. The results showed an increased sensitivity of Mt-0865 to H<sub>2</sub>O<sub>2</sub>, whereas the C-0865 strain exhibited a similar survival rate as the wild-type R1 strain (Figure 5 and Figure S4 in File S1). Furthermore, the survival rate was measured under UV and gamma irradiation. The D<sub>10</sub> value, which represents the irradiating dose required to reduce the population by 90%, was used to assess the resistance of the wild-type R1 and Mt-0865 strains to gamma and UV irradiation. As shown in Figure 6A and B, the wild-type R1 strain showed higher resistance to gamma irradiation and UV radiation than the Mt-0865 strain. Similarly, the mutant strains show higher sensitivity to hydrogen peroxide, as shown in the Figure 6C

### Loss of *dr0865* results in an accumulation of intracellular Mn

It has been previously reported that a high intracellular Mn<sup>2+</sup>/Fe<sup>2+</sup> ratio in *D. radiodurans* helps to protect proteins from oxidative damage, and contributes to its extreme resistance [15,22]. Because the Mt-0865 is sensitive to Mn stress, H<sub>2</sub>O<sub>2</sub> stress, as well as UV and gamma irradiation, inductively coupled plasma mass spectrometry (ICP-MS) analyses were performed to show whether the Mt-0865 strain had lost its ability to maintain homeostasis of manganese and other ions.

As expected, even on TGY medium, the Mn (II) level in the Mt-0865 strain was almost three-fold higher than in the wild-type R1 strain (Figure 7A). Similar results were obtained when the two strains were grown on TGY medium supplemented with Mn<sup>2+</sup>. Furthermore, we also found that the Mn<sup>2+</sup> level was increased when the wild-type R1 strain was grown on manganese-rich TGY medium, compared to normal medium (Figure 7A). In contrast, there was no significant difference in Fe<sup>2+</sup> concentrations between the Mt-0865 and wild-type R1 strains. However, the Fe<sup>2+</sup>

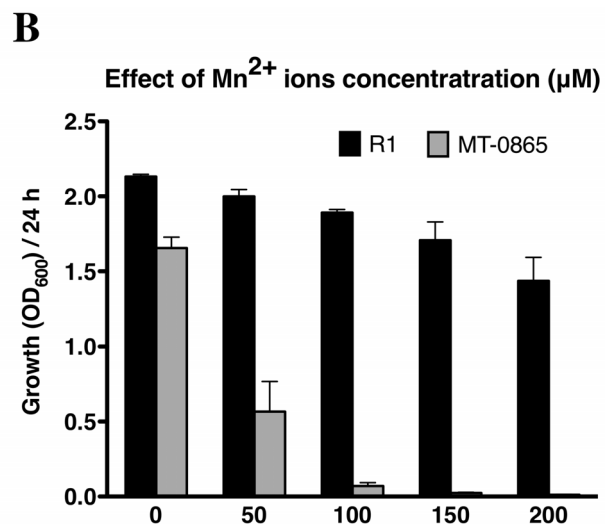

**Figure 4. Sensitivity of the wild-type R1 strain (black bar) and mutant Mt-0865 strain (gray bar) to MnCl<sub>2</sub>.** Strains were cultured in TGY, supplemented with 0, 50, 100 or 150 µM of MnCl<sub>2</sub>. The OD<sub>600</sub> was measured after 12 and 24 h. Data represent the means  $\pm$  standard deviation of three independent experiments. doi:10.1371/journal.pone.0106341.g004

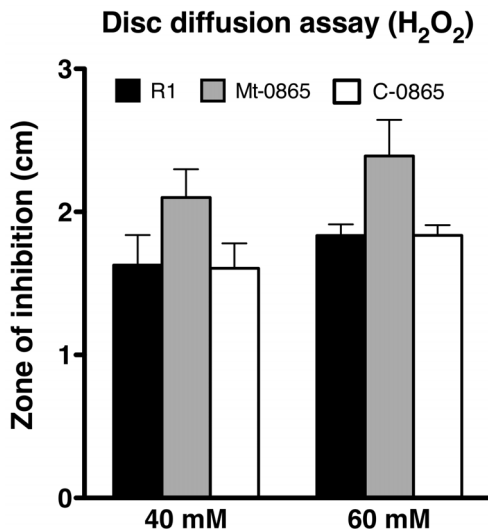

**Figure 5. Hydrogen peroxide sensitivity assay for the wild-type R1, Mt-0865 and C-0865 strains.** The wild-type R1 strain (black bar), Mt-0865 strain (gray bar) and C-0865 strain (white bar) were cultured in TGY plates, overlaid with filter discs saturated with 4  $\mu$ l and 6  $\mu$ l of 1 M solution of H<sub>2</sub>O<sub>2</sub>. doi:10.1371/journal.pone.0106341.g005

concentrations in both wild type and mutant strains increased under Mn stress, indicating that *D. radiodurans* has a system to regulate Mn/Fe homeostasis (Figure 7B). Collectively, these results verified that the Mt-0865 strain is sensitive to Mn<sup>2+</sup> stress and that the sensitivity of the mutant to damaging agents may be caused by excess manganese.

#### Transcriptome changes in the *dr0865* mutant under manganese stress

Because DR0865 is homologous to transcriptional regulators and its disruption resulted in sensitivity to excess manganese, RNA sequencing (RNA-seq) was used to assess changes in transcripts of the wild-type R1 and Mt-0865 mutant strains when cultured in the presence of high (20 mM) levels of MnCl<sub>2</sub>. In total, 12.7 million (M) and 13.3 M pair-end reads were obtained for the wild-type R1 and Mt-0865 strains, respectively. After cleaning the reads, 9.3 M

and 9.8 M reads mapped to the genome, and, after removing rRNA sequences, the unique sequence reads were 4.3 M and 4.4 M (Table 1).

A total of 3,098 of the 3,167 open reading frames (ORFs) of the wild-type R1 strain, and 3,060 of the 3,167 ORFs of Mt-0865 mutant strain were detected by RNA sequence data. In the Mt-0865 strain, 246 genes were up-regulated more than two-fold (Table S1 in File S1) and 317 genes were down-regulated more than two-fold in comparison to the wild-type R1 strain (Table S2 in File S1). The significantly expressed genes were classified in accordance with the Cluster of Orthologous Groups (COG) of proteins database (Table 2). The top three categories were transcription (22%), inorganic ion transport and metabolism (19.2%), and nucleotide transport and metabolism (18.5%).

In this study, our analysis focused on the genes involved in (i) Mn/Fe metabolism, (ii) ROS production, (iii) DNA damage response genes, and (vi) cell cleaning genes (Table 3).

#### (i) Proteins involved in Mn<sup>2+</sup> and Fe<sup>2+</sup> metabolism

The expression of five genes involved in Mn/Fe metabolism was significantly changed under MnCl<sub>2</sub> adaptation conditions (Table 2). *dr1236* (*mntE*), which encodes a putative manganese efflux family protein that controls the removal of excess Mn<sup>2+</sup>, was repressed (Table 2). However, all ATP-dependent Mn<sup>2+</sup> transporter genes, including *dr2283*, *dr2284*, and *dr2523*, were induced. The Mn<sup>2+</sup> transporter gene expression pattern suggested that Mn<sup>2+</sup> concentration was increased in the mutant, which is in agreement with our ICP-MS data. Furthermore, a previous DNA binding assay also supported that ATP-dependent Mn<sup>2+</sup> transporter genes and *mntE* are regulated by DR0865 [23].

#### (ii) Proteins associated with the production of ROS

Manganese is among the essential enzyme cofactors because it protects cells from oxidative damage. However, it can be toxic at high concentrations and, therefore, its level should be strictly regulated [17,23]. Previous research showed that cytochromes, flavoproteins, iron-sulfur proteins, NADPH and NADH-dependent enzymes are regarded as the major generators of ROS [1,2]. Under Mn<sup>2+</sup> stress, nine cytochrome-related genes and 12 NADH-dependent enzymes were repressed in the Mt-0865 mutant compared to the wild-type R1 strain. This indicates that the mutant strain compensates for its Mn sensitivity by dampening the production of ROS.

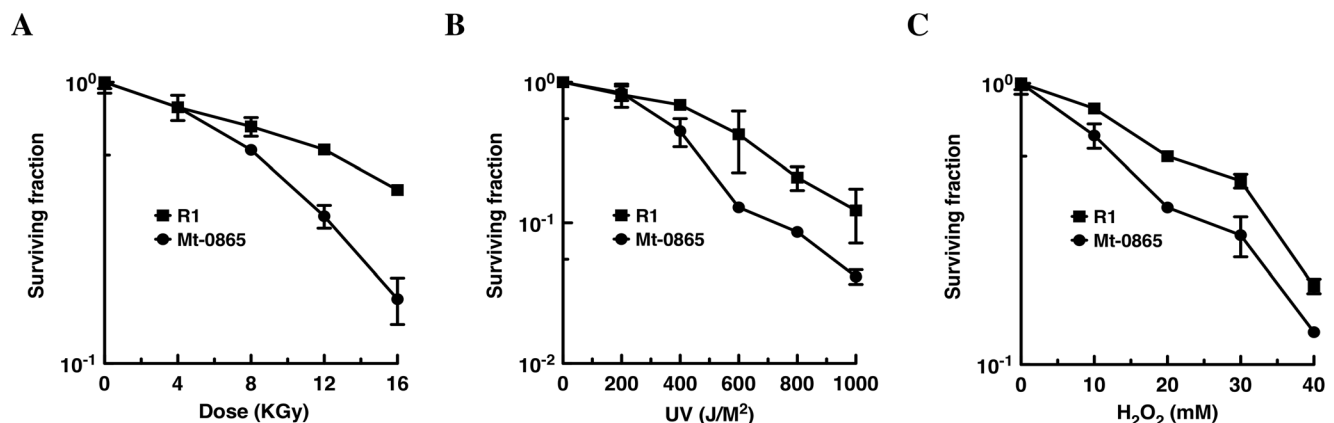

**Figure 6. Survival curves of *D. radiodurans* strains exposed to (A) ionizing irradiation (B) UV irradiation and (C) Hydrogen peroxide.** Wild-type *D. radiodurans* R1 (black square) was compared with the Mt-0865 strain (black circle). Error bars represent standard deviations from three replicate experiments. doi:10.1371/journal.pone.0106341.g006

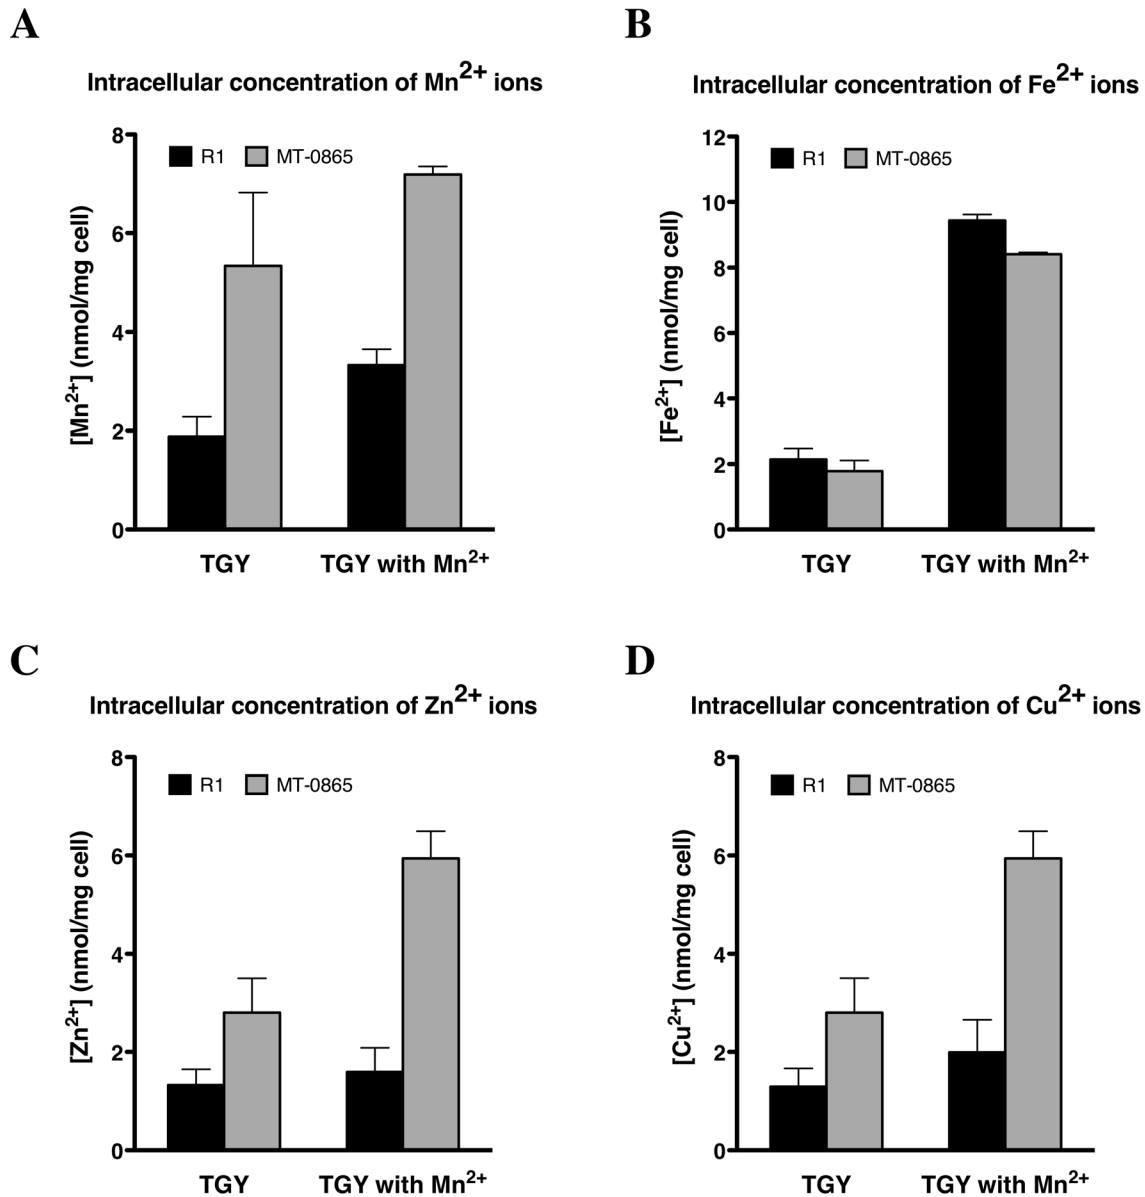

**Figure 7. Analysis of the intracellular ion content of the wild-type R1 and Mt-0865 strains, cultured in a medium supplemented with or without 50  $\mu M$  manganese; (A) manganese, (B) iron, (C) zinc, (D) copper.** The data represent the mean  $\pm$  standard deviation of three independent experiments.

doi:10.1371/journal.pone.0106341.g007

**Table 1.** Summary of sequence reads statistics resulting from Illumina deep sequencing of mutant and wild type strain.

|                                 | Mutant Strain    | Wild type strain |
|---------------------------------|------------------|------------------|
| Raw data (read number)          | 13289865         | 12798354         |
| Raw data (length, bp)           | 200              | 200              |
| Clean data (read number)        | 10260088         | 9998560          |
| Clean data (length, bp)         | 176              | 178              |
| Mapping to genome (read number) | 9831262          | 9299761          |
| Mapping to rRNA                 | 5289176 (53.8%)  | 4728594 (50.85%) |
| Unique mapping                  | 4441705 (45.18%) | 4387406 (47.18%) |

doi:10.1371/journal.pone.0106341.t001

**Table 2.** Classification of the genes with different levels of expression according to the Cluster of Orthologous Groups of proteins (COG) database.

| COG_type <sup>1</sup>                      | Total genes | Induced genes | Repressed genes | Total rate <sup>2</sup> |
|--------------------------------------------|-------------|---------------|-----------------|-------------------------|
| <b>Information storage and processing:</b> |             |               |                 |                         |
| J                                          | 165         | 10            | 6               | 9.6%                    |
| K                                          | 149         | 13            | 21              | 22.8%                   |
| L                                          | 138         | 5             | 12              | 12.3%                   |
| B                                          | 1           | 0             | 0               | 0                       |
| <b>Cellular processes and signaling:</b>   |             |               |                 |                         |
| D                                          | 26          | 0             | 4               | 15.4%                   |
| V                                          | 50          | 1             | 7               | 16%                     |
| T                                          | 119         | 5             | 9               | 11.2%                   |
| M                                          | 110         | 6             | 9               | 13.6%                   |
| N                                          | 21          | 0             | 2               | 9.5%                    |
| U                                          | 40          | 0             | 3               | 7.5%                    |
| O                                          | 108         | 6             | 12              | 16.7%                   |
| <b>Metabolism:</b>                         |             |               |                 |                         |
| C                                          | 140         | 7             | 28              | 25%                     |
| G                                          | 114         | 6             | 10              | 14%                     |
| E                                          | 251         | 13            | 15              | 11.2%                   |
| F                                          | 92          | 10            | 7               | 18.5%                   |
| H                                          | 110         | 8             | 9               | 15.5%                   |
| I                                          | 99          | 5             | 3               | 8%                      |
| P                                          | 130         | 14            | 11              | 19.2%                   |
| Q                                          | 53          | 4             | 2               | 11.3%                   |
| <b>Poorly characterized:</b>               |             |               |                 |                         |
| S                                          | 251         | 19            | 23              | 16.7%                   |
| R                                          | 333         | 19            | 23              | 12.6%                   |

<sup>1</sup>. J: Translation, ribosomal structure and biogenesis; K: Transcription; L: Replication, recombination and repair; B: Chromatin structure and dynamics; D: Cell cycle control, cell division, chromosome partitioning; V: Defense mechanisms; T: Signal transduction mechanisms; M: Cell wall/membrane/envelope biogenesis; N: Cell motility; U: Intracellular trafficking, secretion, and vesicular transport; O: Posttranslational modification, protein turnover, chaperones; C: Energy production and conversion; G: Carbohydrate transport and metabolism; E: Amino acid transport and metabolism; F: Nucleotide transport and metabolism; H: Coenzyme transport and metabolism; Lipid transport and metabolism; P: Inorganic ion transport and metabolism; Q: Secondary metabolites biosynthesis, transport and catabolism; S: Function unknown; R: General function prediction only.

<sup>2</sup>. the total number of significant genes/Number of total genes in this COG  
doi:10.1371/journal.pone.0106341.t002

### (iii) Proteins associated with the DNA damage response

There were 15 induced genes associated with stress responses, but these did not include *katE* or *recA*. However, three antioxidant proteins, *bcp* (*dr1208*), *ahpC* (*dr1209*), and *grxA* (*dr1209*, *dra0072*), were up-regulated in the Mt-0865 strain (Table 3), which indicates that the mutant strain may be under oxidative stress. In addition to the well-characterized components of stress response systems, *D. radiodurans* encodes several proteins whose specific roles are unknown but are likely to be important for the multiple stress resistance phenotypes of the bacterium. An example of a poorly studied, but potentially important, system is the “addiction module” response, which is encoded by two genes, *mazE* (*dr0417*) and *mazF* (*dr0416*). MazF is a stable protein that is toxic to bacteria, whereas MazE protects cells from the toxic effect of MazF, and is degraded by the ClpX serine protease (*dr0202*) (Table 3). When the Mt-0865 mutant was under Mn stress, all of these genes were induced, which suggests that the mutant strain activates the antidote-toxin system to reduce cell growth to avoid the production of ROS. This result is also consistent with the expression patterns of ROS generating genes.

### (iv) Cell cleaning proteins

When the Mt-0865 mutant strain was under Mn stress, we found that the cellular cleansing system, including the export of damaged DNA components and sanitization of intracellular mutagenic precursors, was also induced. First, it was observed that six ABC transporter permease genes, which may control oligonucleotide export, were activated (Table 3) [24]. The export of damaged nucleotides outside the cell might protect the organism from elevated levels of mutagenesis by preventing the reincorporation of damaged bases during DNA synthesis [25]. Second, 15 of 20 *mutT/nudix* family genes were induced, five (*dr0092*, *dr0192*, *dr0261*, *dr0274*, *dr0784*) of which were up-regulated significantly (Table 3). The MutT protein has an 8-oxo-dGTPase activity, which can limit mutation of DNA by hydrolyzing the oxidized products of nucleotide metabolism. The remaining intracellular mutagenic precursors could be sanitized via this superfamily [26]. Finally, it was also found that Lon protease (DR1974) and ClpX protease (DR0202) were induced approximately twofold (Table 3). These ATP-dependent proteases help with cellular sanitization by degrading damaged proteins [27].

**Table 3.** The significant genes were classified into three classes, Mn/Fe metabolism, ROS production genes, and Damage response genes.

| ORF                           | Name           | Description                                             | M <sup>1</sup> |
|-------------------------------|----------------|---------------------------------------------------------|----------------|
| <b>Mn/Fe metabolism:</b>      |                |                                                         |                |
| DR2283                        | <i>dr2283</i>  | Mn ABC transporter permease                             | 1.99           |
| DR2284                        | <i>dr2284</i>  | Mn ABC transporter permease                             | 2.39           |
| DR2523                        | <i>fimA</i>    | Mn/Fe transport system substrate-binding protein        | 3.79           |
| DR1236                        | <i>mntE</i>    | manganese efflux protein                                | -1.69          |
| DR1220                        | <i>feoA</i>    | ferrous iron transport protein A                        | 1.35           |
| <b>ROS production genes</b>   |                |                                                         |                |
| DR0342                        | <i>dr0342</i>  | cytochrome complex iron-sulfur subunit                  | -1.45          |
| DR0344                        | <i>ccmH</i>    | cytochrome c-type biogenesis protein                    | -1.09          |
| DR0346                        | <i>ccmF</i>    | cytochrome c-type biogenesis protein                    | -1.09          |
| DR0347                        | <i>ccmE</i>    | cytochrome c-type biogenesis protein                    | -1.30          |
| DR0348                        | <i>dr0348</i>  | cytochrome c-type biogenesis heme exporter protein C    | -1.46          |
| DR2095                        | <i>dr2095</i>  | c-type cytochrome                                       | -1.39          |
| DR2617                        | <i>ctaA</i>    | cytochrome AA3-controlling protein                      | -1.11          |
| DRC0001                       | <i>drc0001</i> | cytochrome P450-related protein                         | $-\infty^2$    |
| DRC0041                       | <i>drc0041</i> | Cytochrome P450                                         | $-\infty$      |
| DR1492                        | <i>dr1492</i>  | NADH dehydrogenase I subunit N                          | -1.03          |
| DR1493                        | <i>dr1493</i>  | NADH dehydrogenase I subunit M                          | -1.68          |
| DR1494                        | <i>dr1494</i>  | NADH dehydrogenase I subunit L                          | -1.55          |
| DR1497                        | <i>dr1497</i>  | NADH dehydrogenase I subunit I                          | -2.54          |
| DR1498                        | <i>dr1498</i>  | NADH dehydrogenase I subunit H                          | -2.28          |
| DR1499                        | <i>dr1499</i>  | NADH dehydrogenase I subunit G                          | -1.57          |
| DR1500                        | <i>dr1500</i>  | NADH dehydrogenase I subunit F                          | -1.99          |
| DR1501                        | <i>dr1501</i>  | NADH dehydrogenase I subunit E                          | -1.76          |
| DR1503                        | <i>dr1503</i>  | NADH dehydrogenase I subunit D                          | -2.59          |
| DR1504                        | <i>dr1504</i>  | NADH dehydrogenase I subunit C                          | -2.32          |
| DR1505                        | <i>dr1505</i>  | NADH dehydrogenase subunit B                            | -1.79          |
| DR1506                        | <i>dr1506</i>  | NADH dehydrogenase I subunit A                          | -1.44          |
| DRA0243                       | <i>Hmp</i>     | Haemoglobin-like flavoprotein                           | -1.33          |
| <b>Damage response genes:</b> |                |                                                         |                |
| DR1208                        | <i>Bcp</i>     | Antioxidant type thioredoxin fold protein               | $\infty$       |
| DR1209                        | <i>ahpC</i>    | Thiol-alkyl hydroperoxide reductases                    | 1.87           |
| DRA0072                       | <i>grxA</i>    | Glutaredoxin                                            | 3.38           |
| DR2056                        | <i>hslJ</i>    | Related to heat shock protein                           | 1.18           |
| DR0194                        | <i>htpX</i>    | Predicted Zn-dependent proteases                        | 1.69           |
| DR0416                        | <i>mazE</i>    | Regulatory protein, MazF antagonist                     | 1.66           |
| DR0417                        | <i>mazF</i>    | ppGpp-regulated growth inhibitor                        | 1.32           |
| DR_B0088                      | <i>kdpD</i>    | Osmosensitive K1 channel histidine kinase sensor domain | 1.39           |
| DR1667                        | <i>trkH</i>    | Potassium uptake system component                       | -1.92          |
| DR1678                        | <i>trkG</i>    | Potassium uptake system component                       | -2.61          |
| DRA0123                       | <i>arsC</i>    | Arsenate oxidoreductase                                 | -1.31          |
| DR0455                        | <i>strA</i>    | Streptomycin resistance protein                         | -1.62          |
| DR2234                        | <i>dr2234</i>  | involved in multidrug resistance                        | -2.41          |
| DR1695                        | <i>gloA</i>    | Lactoylglutathion lyase, fosphomicin resistance protein | 1.49           |
| DR0599                        | <i>BS_yokD</i> | amino glycoside N3-acetyltransferase                    | 1.52           |
| <b>Cell cleaning genes:</b>   |                |                                                         |                |
| DR0092                        | <i>dr0092</i>  | MutT/nudix family protein                               | 2.69           |
| DR0192                        | <i>dr0192</i>  | MutT/nudix family protein                               | 1.27           |

**Table 3. Cont.**

| ORF     | Name           | Description                                                | M <sup>1</sup> |
|---------|----------------|------------------------------------------------------------|----------------|
| DR0261  | <i>dr0261</i>  | MutT/nudix family protein                                  | 3.33           |
| DR0274  | <i>dr0274</i>  | MutT/nudix family protein                                  | 3.02           |
| DR0784  | <i>dr0784</i>  | MutT/nudix family protein                                  | 1.18           |
| DR0202  | <i>clpX</i>    | ATPase subunit of Clp protease                             | 1.20           |
| DR1974  | <i>Lon</i>     | ATP-dependent Lon serine protease                          | 1.40           |
| DR0958  | <i>dr0958</i>  | peptide ABC transporter permease                           | 1.65           |
| DR0959  | <i>dr0989</i>  | peptide ABC transporter permease                           | 1.44           |
| DR1358  | <i>dr1358</i>  | outer membrane protein                                     | 1.18           |
| DRA0168 | <i>dra0168</i> | ABC transporter permease                                   | 1.54           |
| DRA0268 | <i>dra0268</i> | adenine deaminase-like protein                             | 1.21           |
| DRA0323 | <i>dra0323</i> | urea/short-chain amide ABC transporter ATP-binding protein | 1.07           |

<sup>1</sup>. M value means log<sub>2</sub>Ratio, Ratio = FPKM<sub>(M-0865)</sub>/FPKM<sub>(R1)</sub>

<sup>2</sup>. ∞ means gene's expression level is not detected in one sample, but detected in another sample.

doi:10.1371/journal.pone.0106341.t003

### qRT-PCR analysis

To confirm the transcriptome assay results, gene expression in the Mt-0865 mutant and in the wild-type R1 strains was analyzed using quantitative real time PCR (qRT-PCR) analysis. Eight genes (*dr2523*, *dr2283*, *dr1709*, *dr1236*, *dr1998*, *dr1506*, *dr0348*, and *dr0828*) were quantified under normal growth conditions and after treatment with Mn<sup>2+</sup>. Four of these genes are Mn<sup>2+</sup> transport genes (*dr2523*, *dr2283*, *dr1709* and *dr1236*). The DR2523 and DR2283 proteins are ATP-dependent transporters, the DR1709 protein belongs to the Nramp family of transporters, and DR1236 is a Mn<sup>2+</sup> efflux gene. The *dr1998* gene encodes a major catalase (KatE), which plays an important role in the protection of *D. radiodurans* from oxidative stress and ionizing radiation [1]. The DR1506 protein is a NADH dehydrogenase and DR0348 is the cytochrome c-type biogenesis heme exporter protein C. It was previously shown that *dr1506* and *dr0348* are associated with the production of ROS [1]. The *dr0828* gene encodes an isocitrate lyase, which is an enzyme in the glyoxylate cycle that catalyzes the cleavage of isocitrate to succinate and glyoxylate. Previous research has shown that when irradiated, *D. radiodurans* represses the tricarboxylic acid (TCA) cycle and activates the glyoxylate bypass [28].

It was observed that under normal growth conditions, the expression of *dr2523*, *dr2283*, and *dr1709* increased 1.96-fold, 4.24-fold and 4.41-fold, respectively, in the Mt-0865 mutant strain compared to the wild-type R1 strain (Table S3 in File S1), while the *dr1236* gene was significantly repressed 24.32-fold in the mutant strain. In addition, the transcript levels of *dr1506* and *dr0348* decreased, whereas the level of the *dr0828* transcript increased, in the mutant strain (Figure 8A and Table S3 in File S1). Gene expression levels were also measured under Mn<sup>2+</sup> stress. The expression of the Mn<sup>2+</sup> transporter gene *dr2539* increased 20.14-fold, while expression of *dr1236* decreased 53.94-fold in the Mt-0865 mutant (Figure 8A). This suggests that under Mn<sup>2+</sup> stress, the wild-type strain attempts to stop Mn<sup>2+</sup> uptake and opens the Mn<sup>2+</sup> efflux system, whereas this does not occur in the mutant strain. These results provide further evidence that Mn<sup>2+</sup> transporter genes are not properly expressed in the mutant. In addition, the *dr1506* and *dr0348* genes were repressed and the *dr0828* gene was induced. This suggests that, under Mn (II) stress, the wild-type strain lowers its metabolic rate to reduce ROS production and activates the glyoxylate bypass to provide energy,

whereas these adaptations are defective in the mutant strain. Overall, the pattern of gene expression indicates that the mutant strain is likely subject to more damage than the wild-type strain under Mn<sup>2+</sup> stress.

### Discussion

Manganese is a trace element that is essential for many cellular functions in all organisms. For example, Mn<sup>2+</sup> is required as a co-factor for super-oxide dismutase, which is critical for preventing cellular oxidative stress [29]. However, high manganese levels inhibit calcium influx and promote the exchange of accumulated Ca<sup>2+</sup>, and inhibit RNA and protein synthesis [3]. Thus, maintaining metal ion homeostasis is necessary for all organisms. *D. radiodurans* is well known for its extreme resistance to radiation and oxidants and its high intracellular Mn/Fe ratio is an important factor that contributes to this resistance. In this study, we identified a unique Mur homolog that is encoded by *dr0865*, and data showed that it is Mn<sup>2+</sup>-specific regulator.

Sequence analyses showed that DR0865 contains three metal-binding domains that are present in the *H. pylori* Fur homolog. Previous data showed that the C<sub>92</sub>XXC<sub>95</sub> motif is necessary for the construction of the ZnS<sub>2</sub> (N/O)<sub>2</sub> domain, while the C<sub>133</sub>XXXXC<sub>138</sub> motif is not important [20,30]. Further research is needed to discern the function of the C<sub>82</sub>XXC<sub>85</sub> and C<sub>112</sub>XXC<sub>115</sub> motifs in *D. radiodurans*. Because the phenotype of the Mt-0865 mutant strain showed that DR0865 is a novel Mur protein, we compared the DR0865 amino acid sequence to the *R. leguminosarum* Mur protein [12]. The results showed that the *R. leguminosarum* Mur protein does not have domain I, while it contains domains II and III (data not shown). This indicates that domains II and III are important for Mn<sup>2+</sup> ion regulation.

It has been suggested that the accumulation of Mn<sup>2+</sup> or a higher Mn/Fe ratio benefit the radio-resistance of *D. radiodurans*. However, the excess of Mn<sup>2+</sup> is toxic to the cell. Although the precise mechanism of Mn<sup>2+</sup> toxicity is poorly understood, three mechanisms have been suggested previously. In the first mechanism, Mn<sup>2+</sup> cell toxicity may be associated with its interaction with other essential trace elements, such as Fe<sup>2+</sup>, Zn<sup>2+</sup> and Cu<sup>2+</sup> [31]. Human studies have shown that chronic exposure to Mn<sup>2+</sup> appears to be associated with similar increases in cellular Fe<sup>2+</sup> uptake, which consequently produces cellular oxidative stress and



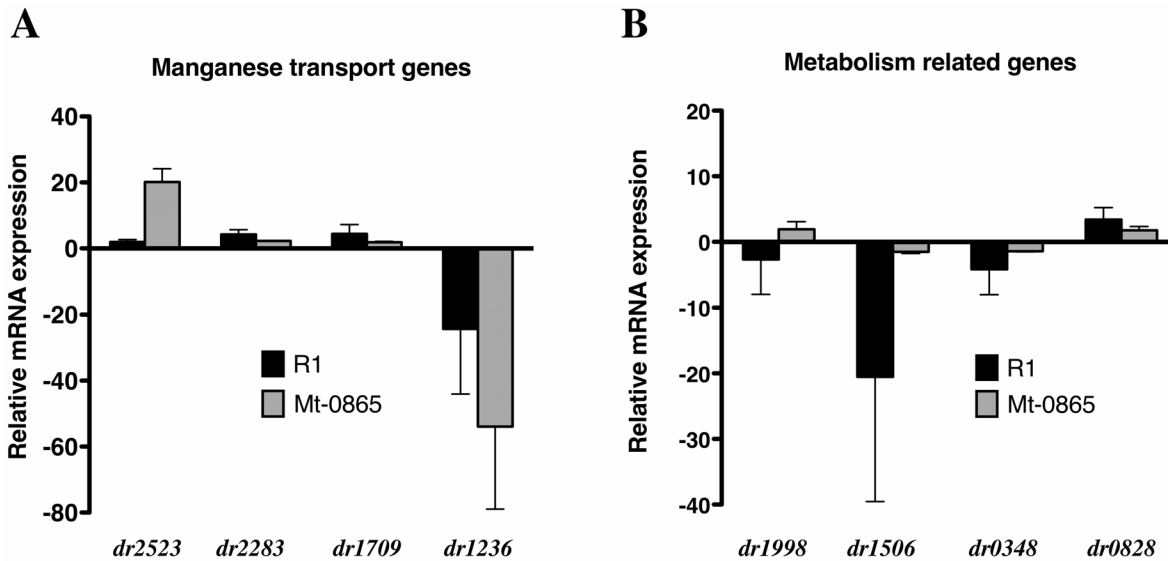

**Figure 8. The expression of potential DR0865-dependent genes in wild-type *D. radiodurans* compared to the mutant strain, under normal conditions (black bar), and wild-type R1 under manganese stress compared with the mutant strain under manganese stress (grey bar).** Error bars represent standard deviations from three replicate experiments. (A) Four manganese transport genes, (B) metabolism related genes.

doi:10.1371/journal.pone.0106341.g008

also increases the concentration of  $\text{Cu}^{2+}$  and  $\text{Zn}^{2+}$  [31]. When the wild-type R1 strain was under  $\text{Mn}^{2+}$  stress, the intracellular concentration of  $\text{Mn}^{2+}$  and  $\text{Fe}^{2+}$  increased significantly, whereas the concentrations of  $\text{Zn}^{2+}$  and  $\text{Cu}^{2+}$  increased slightly (Figure 7C and D). Under normal growth conditions, the Mt-0865 strain had higher  $\text{Mn}^{2+}$ ,  $\text{Cu}^{2+}$  and  $\text{Zn}^{2+}$  contents than the wild-type R1 strain. These data further confirmed that mutation of the *dr0865* gene causes a defect in the control of  $\text{Mn}^{2+}$  metabolism, which also results in changes in the concentrations of  $\text{Cu}^{2+}$  and  $\text{Zn}^{2+}$ . Interestingly,  $\text{Fe}^{2+}$  concentration was not significantly different between the wild-type and mutant strains under  $\text{Mn}^{2+}$  stress (Figure 7B), which may be due to the distinct *D. radiodurans*  $\text{Fe}^{2+}$  regulation system, which utilizes OxyR and DtxR regulators.

The second mechanism is that high intracellular levels of  $\text{Mn}^{2+}$  inhibit RNA and protein synthesis, and manganese may exert a toxic effect through such inhibition [3]. When *Bacillus stearothermophilus* was grown in media containing excess  $\text{Mn}^{2+}$ , its doubling time increased more than two-fold. A similar effect on growth was also observed in the Mt-0865 mutant under normal growth conditions. The third mechanism suggests that  $\text{Mn}^{2+}$  can participate in reactions that potentially increase ROS, which subsequently causes oxidative damage [32]. These three mechanisms may explain why the mutant was sensitive to different DNA damaging agents.

The RNA-seq data identified 562 genes (approximately 17% of the genome) that showed at least a twofold change in expression between the Mt-0865 mutant and the wild-type R1 strain, which indicates that these genes were regulated by *dr0865* either through direct or indirect mechanisms. Using the Kyoto Encyclopedia of Genes and Genomes (KEGG) database, we found that genes involved in metabolic pathways, the biosynthesis of secondary metabolites, oxidative phosphorylation and nitrogen metabolism were significantly repressed in the mutant strain. This indicates that the Mt-0865 mutant is likely to suffer more cellular damage under  $\text{Mn}^{2+}$  stress than the wild-type strain. This phenomenon may be caused by higher  $\text{Mn}^{2+}$  levels in the mutant, which would increase ROS levels and lead to DNA damage [33]. Five *mutT*/

*nudix* family genes were also activated but no major DNA repair genes (such as *recA* or *prrA*) were induced, which further confirms our hypothesis.

Interestingly, we found that the heme biosynthesis pathway (HemA, HemE and HemN) was slightly repressed in the Mt-0865 mutant (Table S2 in File S1). Hemes are biosynthesized from protoporphyrin and free ferrous iron [34] and are cofactors for cytochromes, catalases and peroxidases. This may explain why nine cytochrome genes were down-regulated under  $\text{Mn}^{2+}$  stress in the mutant. In addition, two vitamin B12 biosynthesis proteins, *drb0010* (cobalamin biosynthesis protein) and *drb0012* (cobalamin synthase), were also repressed. Vitamin B12 is a water-soluble vitamin that is normally involved in DNA synthesis and regulation, as well as in fatty acid biosynthesis and energy production. The *dr0910* and *dr1076* genes, which encode cell wall protein and cell wall synthesis proteins, respectively, were also down-regulated. The reduction of vitamin B12 and cell wall proteins may be caused by high Mn (II) levels, which consequently results in the inhibition of cell growth.

Five ribonucleases (*dr0020*, *dr0859*, *dr1949*, *dr2374* and *drb0107*) were induced at least two-fold in the Mt-0865 mutant (Table S1 in File S1). Ribonucleases in prokaryotic toxin-antitoxin systems are proposed to function as stress-response elements. The degradation of RNA within a cell leads to fragments of RNA that are no longer needed and can be cleaned up as part of the cellular protection system. Five cation transporter genes (*dr0748a*, *dr0816*, *dr0883*, *dra0168*, *dra0361*) were also activated, which explains why the mutant had higher ion concentrations.

Overall, our work presents a biochemical mechanism for Mn (II) sensing by the Mur homolog gene in *D. radiodurans*. Using qRT-PCR and global transcriptome analysis, we provided evidence that DR0865 functions as a positive (*dr1236*) and a negative regulator (*dr2283*, *dr2284*, *dr2523*) of different classes of  $\text{Mn}^{2+}$  transporter genes. More research is needed to establish the detailed mechanism of Mur regulation of these important genes. The potential communication between OxyR and other regulators, such as DtxR (*dr2539*), should be explored to determine

whether it is required for the intricate coordination of oxygen radical detoxification.

## Experimental Procedures

### Strains, media and primers

All the primers used in this study are listed in Table 4. The *E. coli* strains were grown in Luria-Bertani (LB) broth medium (1% tryptone, 0.5% yeast extract and 1% sodium chloride) with aeration or on LB agar plates (1.2% Bacto-agar) at 37°C supplemented with the appropriate antibiotics. All *D. radiodurans* R1(ATCC 13939) strains used in this work were grown at 30°C in TGY medium (0.5% tryptone, 0.1% glucose and 0.3% yeast extract) with aeration or on TGY plates supplemented with 1.5% Bacto-agar.

### Sequence alignment

The protein sequence of previously characterized Fur proteins found in *A. ferrooxidans*, *P. aeruginosa*, *E. coli*, *B. subtilis*, *M. marinum*, *D. radiodurans*, *H. pylori* were obtained from the NCBI database. The protein sequence alignment of selected Fur proteins was generated using ClustalW.

### Disruption of the DR0865 gene in *D. radiodurans*

The mutant strain was constructed as described previously [18]. Primer ME1 and ME2 were used to amplify a *Bam*HI fragment upstream of targeted genes, and primers ME3 and ME4 were used to obtain a *Hind*III fragment downstream of targeted genes respectively (Table 5). The kanamycin resistance cassette containing the *groEL* promoter was obtained from a shuttle plasmid, pRADK. After this three DNA fragments were digested and ligated. The ligation products were used as template for PCR to amplify the resulting PCR fragment (ME1 and ME5 used as primers), which was then transformed into exponential-phase cells by  $\text{CaCl}_2$  treatment [35]. The mutant strains were selected on TGY agar plates supplemented with 30  $\mu\text{g}/\text{ml}$  kanamycin. Null mutants were confirmed by PCR product sizes, enzyme-digested electrophoresis, and DNA sequencing and the resulting mutant was designated Mt-0865.

### Complementation of DR0865 mutant

Complementation strain was constructed as described [18,36]. Briefly, genome DNA was isolated from wild-type R1 strain. A

2500-bp region containing the *dr0865* gene was amplified by ME5 and ME6 (Table 5), and ligated to pMD-18 T-Easy vector (Takara, JP), designed as pMD-dr0865. After digested by *Nde*I and *Bam*HI, the target gene *dr0865* was ligated to *Nde*I and *Bam*HI-pre-digested pRADK, which named as pRKR. The complementation plasmid were confirmed by PCR and DNA sequence analysis, and transformed into Mt-0865, resulting in functional complementation strains. Selection for *D. radiodurans* complement strain was achieved on TGY plates, supplemented with kanamycin (30  $\mu\text{g}/\text{ml}$ ) and chloramphenicol (3  $\mu\text{g}/\text{ml}$ ).

### Growth curve assay

To examine bacterial growth in vitro as described previously was little modified [37], the single clone of the wild-type R1, Mt-0865 and C-0865 strains were transferred into 5 ml liquid TGY medium. When the  $\text{OD}_{600}$  of the cultures reached 1.0, 1 mL of each culture was added to 100 mL fresh TGY medium. Three repeats were performed for each strain. The nine cultures were incubated with shaking at 30°C and samples were taken every two hours to measure the  $\text{OD}_{600}$  value. The cultures were incubated with 250 rpm at 30°C and samples were taken to measure the  $\text{OD}_{600}$  value at different time. All experiments were repeated in triplicate.

### Cation sensitivity assays

Cation sensitivity assays were carried out as described previously [17]. Solutions (1 M) of manganese chloride, manganese sulfate, zinc chloride, copper chloride, copper sulfate, cobalt (II) chloride, nickel chloride, cadmium chloride, ferrous sulfate, ferrous chloride, ferric chloride, magnesium chloride, calcium chloride (sigma) were prepared in milli-Q water and filter-sterilized by passing through 0.22- $\mu\text{m}$  filters. Newly fresh clone was taken from the wild-type R1, Mt-0865 and C-0865 TGY plates, into 5 ml TGY fresh media, when the cells grown up to stationary phase. Then, the cells were plated on TGY plates and overlaid with 5-mm sterile discs containing 1 M various cation solutions. The plates were incubated for three days, and the inhibition zone of each disc was measured. All the data provided here represent the mean and standard deviation of at least three independent experiments (mean  $\pm$  SD of three experiments).

Similarly, to ascertain the effect of  $\text{Mn}^{2+}$  on growth of Mt-0865 and wild-type R1,  $1 \times 10^5$  CFU  $\text{ml}^{-1}$ , were grown in TGY supplemented with increasing concentration of  $\text{MnCl}_2$ . The

**Table 4.** Bacterial strains and plasmids used in this study.

| Strain or plasmid           | Relevant marker                                                                                   | Source     |
|-----------------------------|---------------------------------------------------------------------------------------------------|------------|
| <b>Strains</b>              |                                                                                                   |            |
| <i>E. coli</i> DH5 $\alpha$ | Propagation for plasmid                                                                           | Invitrogen |
| <i>E. coli</i> BL21(pLysS)  | DR0865 expression strain                                                                          | Invitrogen |
| <i>D. radiodurans</i> R1    | ATCC13939                                                                                         | This lab   |
| Mt-0865                     | As R1, but <i>dr0865::kan</i>                                                                     | This study |
| C-0865                      | Mt-0865 complemented with <i>pRKR</i>                                                             | This study |
| <b>Plasmids</b>             |                                                                                                   |            |
| pMD18-T                     | TA cloning vector                                                                                 | Takara     |
| pMR                         | pET-28a derivative recombinant expressing and <i>dr0865</i>                                       | This study |
| pRADK                       | <i>E. coli-D. radiodurans</i> shuttle vector carrying <i>D. radiodurans</i> <i>groEL</i> promoter | [36]       |
| pRKR                        | pRADK derivative expressing <i>D. radiodurans</i> <i>dr0865</i>                                   | This study |

doi:10.1371/journal.pone.0106341.t004

**Table 5.** Primers used in this study.

| Primer                       | Sequence (5' → 3')         |
|------------------------------|----------------------------|
| <b>Mutation primers</b>      |                            |
| 0865upF(ME1)                 | CGAAGAAGTCGCCAACAACC       |
| 0865upR(ME2)                 | GGATCCGGAGGCAGGGTAGCAAAGCG |
| 0865downF(ME3)               | AAGCTTGGCGGAAGTTTTACTGCGTG |
| 0865downR(ME4)               | ACACTAACCGTTTTTCGCCATTGCC  |
| <b>Complement primers</b>    |                            |
| 0865F (ME5)                  | CATATGACCGCCCGCCGAGCAC     |
| 0865R (ME6)                  | GGATCCTTAGTGGCCCGGTCTTC    |
| <b>Real time PCR primers</b> |                            |
| RT-dr1506F                   | GCGGGAAAGGCTGGAGTCAGGAGG   |
| RT-dr1506R                   | CTTGGTGGGGTCGCCTTTTTGGG    |
| RT-dr0348F                   | CCTCGGTAATTCATCATCCGTGGC   |
| RT-dr0348R                   | TTGACGGTGGCGGTCTGGTGAATG   |
| RT-dr1236F                   | CATCAATCTGGTGTGGGCGAAC     |
| RT-dr1236R                   | CAAGCAGCGGGTCAAGGATGTG     |
| RT-dr0828F                   | GACACCATGACCCCAACCCCAAAA   |
| RT-dr0828R                   | GGTGTAATCGATGGGCGAGGCTG    |
| RT-dr2523F                   | CGACGCCATACCTTTTACAGC      |
| RT-dr2523R                   | GTCAGCTCCTTACCCGGCAC       |
| RT-dr2283F                   | GGAGCTGCGGACCATGA          |
| RT-dr2283R                   | GCGAGCGCCAGCAGAAAA         |
| RT-dr1998F                   | GGGCGTGGACAAGCGTATTC       |
| RT-dr1998R                   | GTAGACGGGGCTTCTGCT         |
| RT-dr1709F                   | GCGATGGTATTGAGAACCT        |
| RT-dr1709R                   | GTTCCGCCTGAATCCAGTAA       |

**Note:** straight line represents restriction site.  
doi:10.1371/journal.pone.0106341.t005

OD<sub>600</sub> value was measured after 12 h and 24 h post incubation. All the data provided here represent the mean and standard deviation of at least three independent experiments (mean ± SD of three experiments).

### H<sub>2</sub>O<sub>2</sub> sensitivity assays (Oxidative stress assays)

The discs diffusion assay to test H<sub>2</sub>O<sub>2</sub> sensitivity, was performed as described previously with a little modification [38,39]. The strain was cultured up to log phase and 130 µl aliquots were spread on TGY plates. A sterile 5 mm-diameter filter discs, containing 4 µl and 6 µl of 1 M H<sub>2</sub>O<sub>2</sub> was placed on the surface of the TGY plate. After incubation at 30°C for three days, the size of the area cleared of bacteria (zone of inhibition) was measured. For the curve H<sub>2</sub>O<sub>2</sub> treatment, the cultures were treated with different concentrations of H<sub>2</sub>O<sub>2</sub> for 30 min and then plated on TGY plates, as prescribed previously [40]. All the data provided here represent the mean and standard deviation of at least three independent experiments (mean ± SD of three experiments).

### Gamma irradiation and UV sensitivity assays

Survival curves of the wild-type R1 and Mt-0865 cells were cultured in TGY broth to OD<sub>600</sub> ~1.0. For the Gamma radiation treatment, the 100 ml cultured was irradiated with different doses of <sup>60</sup>Co gamma at room temperature, which correspond to doses from 0 to 16 kGy, as previously published [41,42]. After the irradiation treatment, the culture centrifuged and then re-

suspended in phosphate buffer (1XPBS Buffer, pH 7.5). The cells were plated on TGY plates and incubated at 30°C for at least three days. The colonies were counted. All the data provided here represent the mean and standard deviation of at least three independent experiments (mean ± SD of three experiments).

For the UV treatment, the cells were cultured in TGY broth to OD<sub>600</sub> ~1.0, as described previously [17,43]. The cells were re-suspended in 1XPBS buffer (pH 7.5), then plated on TGY plates and exposed to different doses of UV radiation at 254 nm. All the data provided here represent the mean and standard deviation of at least three independent experiments (mean ± SD of three experiments).

### Assay of intracellular Mn, Fe, Zn and Cu ion concentration

The protocol for determining intracellular concentration of metals ions was identical to previously reports [17]. *D. radiodurans* R1 and Mt-0865 were cultured in 5 ml TGY broth and re-inoculated in 500 ml TGY broth which had been pretreated with Chelex to remove any cat-ion, and then supplemented with 50 µM manganese chloride. The cells were grown up to OD<sub>600</sub> ~0.6–0.8 and harvested. After centrifugation at 10000 g, 4°C for 10 min, the pellets were washed three times with 1xPBS (pH 7.5), containing 1 mM EDTA and rinsed three times with 1xPBS, without EDTA. Cells (1/10 of the total volume) were withdrawn to measure the dry weight. For ion analysis, 1 ml of Ultrex II nitric

acid (Fluka AG., Buchs, Switzerland) was added to the rest cells and incubated at 100°C for 1 h. After centrifugation at 20,000 g for 20 minutes, the supernatant was filtered against 0.45 µM membrane. The concentration of samples was analyzed for ion content by inductive coupled plasma mass spectrometry (ICP-MS, Model Agilent 7500a, Hewlett-Packard, Yokogawa Analytical System, Tokyo, Japan). A control prepared in the same manner but without 50 µM manganese chloride. All the data provided here represent the mean and standard deviation of at least two independent experiments (mean ± SD of twice experiments).

### Total RNA isolation

To see the effect of Mn<sup>2+</sup> on the genome level, the total RNA was extracted from the three biological replicates of wild-type R1 and Mt-0865 under Mn<sup>2+</sup> stress. Briefly, the wild-type R1 and Mt-0865 strains were cultured in a 5 ml TGY broth and re-inoculated in a 500 ml TGY broth. When the cells grow to OD<sub>600</sub>~0.4–0.45, 20 mM MnCl<sub>2</sub> was added to the broth and further cultured at 30°C for half an hour. The pellets were washed three times with 1XPBS buffer (pH 7.5), and total RNA was extracted from cell cultures using TRIzol reagent (Invitrogen US, ice) as the kit protocol.

### Bacterial RNA sequence library construction

Total RNA from three wild-type R1 and mutant strain (Mt-0865) were pooled, respectively, and rRNA (include 16S and 23S) was removed from 4 µg total RNA by Microbexpress™ (Ambion AM1905), and the left RNA was chemically fragmented. The sequence library construction is according to ScriptSeq mRNA-Seq Library Preparation Kit (Illumina-compatible). Briefly, the fragmented RNA is reverse-transcribed into cDNA using the SuperScript double-stranded cDNA synthesis kit (Invitrogen) with the addition of SuperScript III reverse transcriptase (Invitrogen), and random primers containing a tagging sequence at their 3' ends. This was followed by RNase A (Roche, Germany) treatment, phenol-chloroform extraction, and ethanol precipitation. The resulting cDNAs were ligated to 5' DNA/DNA adaptor, and the di-tagged cDNAs was purified by PAGE gel, the insert fragment size is 150 bp~250 bp. The purification products were PCR amplified in 18 cycles using a high-fidelity DNA polymerase. PCR products were purified using the PAGE gel. Both direct cDNAs were sequenced simultaneously using a single flow cell of the Illumina HiSeq2000. All the sequence assays were performed in Zhejiang TianKe Company.

### Transcriptome analysis

The images generated by the sequencers were converted into nucleotide sequences by a base-calling pipeline. The raw reads

were saved in the fastq format. Three criteria were used to filter out the raw reads according to previously published [44], (i) Remove reads with sequence adaptors; (ii) remove reads with more than 20% 'N' bases; (iii) remove low-quality reads, which have more than 40% QA ≤ 20 bases. All subsequent analyses were based on clean reads. Only reads with high quality value were selected and used in the mapping using Tophat [45]. No more than 2-mismatches were allowed in the alignment for each read, and only the unique mapping reads used in the latter analysis. Cufflink and Cuff-diff were used to calculate Fragments Per Kilo base of transcript per Million mapped reads (FPKM), and find significantly expressed genes, respectively. The annotation of the *D. radiodurans* genome obtained from NCBI.

### Reverse transcription-PCR (RT-PCR) analysis of expression of genes

QRT-PCR assay utilized RNA samples obtained from different condition and first-strain cDNA synthesis was carried out in 20 µl of reaction containing 1 µg of RNA sample combined with 3 µg of random hexamers using SuperScript III Reverse Transcriptase kit (Invitrogen). Each measurement was obtained for three replicate. Then Quant SYBER Premix FX Taq™ (TaKaRa Biotechnology (Dalian) Co. Ltd, China) was used to amplification following the manufactures instruction. As an internal control, *dr0089* was used as a house-keeping, encoding the glycosyl transferase [18]. All primers used in QRT-PCR are shown in Table 5. All assays were performed using the STRAGENE Mx300PTM Real-time detection. Data analysis was carried out with iCycler software (Bio-rad Laboratories). The ratio of the copy number for the treatment to the control copy number was calculated. Differences in relative transcript abundance level were calculated using 2<sup>-ΔΔT</sup> [18].

### Statistical analysis

All data are presented as mean ± standard error of the mean (SEM). Statistical analysis was performed on the raw data using paired student's *t*-test; *p* values <0.05 were considered significant.

### Supporting Information

**File S1 Combined Supporting Information file.**  
(DOC)

### Author Contributions

Conceived and designed the experiments: YH HC. Performed the experiments: AMUHS YZ YW GY QZ LW BT. Analyzed the data: AMUHS YZ HC. Contributed reagents/materials/analysis tools: YH HC. Wrote the paper: YH HC AMUHS.

### References

- Ghosal D, Omelchenko MV, Gaidamakova EK, Matrosova VY, Vasilenko A, et al. (2005) How radiation kills cells: survival of *Deinococcus radiodurans* and *Shewanella oneidensis* under oxidative stress. *FEMS Microbiol Rev* 29: 361–375.
- Cabiscol E, Tamarit J, Ros J (2000) Oxidative stress in bacteria and protein damage by reactive oxygen species. *Int Microbiol* 3: 3–8.
- Cheung HY, Vitkovic L, Brown MRW (1982) Toxic effect of manganese on growth and sporulation of *Bacillus stearothermophilus*. *Journal of General Microbiology* 128: 2395–2402.
- Faulkner MJ, Helmann JD (2011) Peroxide stress elicits adaptive changes in bacterial metal ion homeostasis. *Antioxid Redox Signal* 15: 175–189.
- Andrews SC, Robinson AK, Rodriguez-Quinones F (2003) Bacterial iron homeostasis. *FEMS Microbiol Rev* 27: 215–237.
- Escolar L, Perez-Martin J, de Lorenzo V (1999) Opening the iron box: transcriptional metalloregulation by the Fur protein. *Journal of Bacteriology* 181: 6223–6229.
- Gaballa A, Wang T, Ye RW, Helmann JD (2002) Functional analysis of the *Bacillus subtilis* Zur regulon. *Journal of Bacteriology* 184: 6508–6514.
- Zhang T, Ding Y, Li T, Wan Y, Li W, et al. (2012) A Fur-like protein PerR regulates two oxidative stress response related operons *dpr* and *metQIN* in *Streptococcus suis*. *Bmc Microbiology* 12: 85.
- Gaballa A, Wang T, Ye RW, Helmann JD (2002) Functional analysis of the *Bacillus subtilis* Zur regulon. *J Bacteriol* 184: 6508–6514.
- Hamza I, Chauhan S, Hassett R, O'Brian MR (1998) The bacterial *irr* protein is required for coordination of heme biosynthesis with iron availability. *Journal of Biological Chemistry* 273: 21669–21674.
- Qi ZH, O'Brian MR (2002) Interaction between the bacterial iron response regulator and ferroxidase mediates genetic control of heme biosynthesis. *Molecular Cell* 9: 155–162.
- Diaz-Mireles E, Wexler M, Sowers G, Bellini D, Todd JD, et al. (2004) The Fur-like protein Mur of *Rhizobium leguminosarum* is a Mn(2+)-responsive transcriptional regulator. *Microbiology* 150: 1447–1456.

13. Battista JR, Earl AM, Park MJ (1999) Why is *Deinococcus radiodurans* so resistant to ionizing radiation? *Trends Microbiol* 7: 362–365.
14. Repine JE, Pfenninger OW, Talmage DW, Berger EM, Pettijohn DE (1981) Dimethyl sulfoxide prevents DNA nicking mediated by ionizing radiation or iron/hydrogen peroxide-generated hydroxyl radical. *Proc Natl Acad Sci U S A* 78: 1001–1003.
15. Daly MJ, Gaidamakova EK, Matrosova VY, Vasilenko A, Zhai M, et al. (2004) Accumulation of Mn(II) in *Deinococcus radiodurans* facilitates gamma-radiation resistance. *Science* 306: 1025–1028.
16. Kamble VA, Misra HS (2010) The SbcCD complex of *Deinococcus radiodurans* contributes to radioresistance and DNA strand break repair in vivo and exhibits Mre11-Rad50 type activity in vitro. *DNA Repair (Amst)* 9: 488–494.
17. Sun H, Xu G, Zhan H, Chen H, Sun Z, et al. (2010) Identification and evaluation of the role of the manganese efflux protein in *Deinococcus radiodurans*. *BMC Microbiol* 10: 319.
18. Chen H, Xu G, Zhao Y, Tian B, Lu H, et al. (2008) A novel OxyR sensor and regulator of hydrogen peroxide stress with one cysteine residue in *Deinococcus radiodurans*. *PLoS One* 3: e1602.
19. Chen H, Wu R, Xu G, Fang X, Qiu X, et al. (2010) DR2539 is a novel DtxR-like regulator of Mn/Fe ion homeostasis and antioxidant enzyme in *Deinococcus radiodurans*. *Biochem Biophys Res Commun* 396: 413–418.
20. Dian C, Vitale S, Leonard GA, Bahlawane C, Fauquant C, et al. (2011) The structure of the *Helicobacter pylori* ferric uptake regulator Fur reveals three functional metal binding sites. *Mol Microbiol* 79: 1260–1275.
21. Rosch JW, Sublett J, Gao G, Wang YD, Tuomanen EI (2008) Calcium efflux is essential for bacterial survival in the eukaryotic host. *Mol Microbiol* 70: 435–444.
22. Daly MJ, Gaidamakova EK, Matrosova VY, Vasilenko A, Zhai M, et al. (2007) Protein oxidation implicated as the primary determinant of bacterial radioresistance. *Plos Biology* 5: e92.
23. Sun H, Li M, Xu G, Chen H, Jiao J, et al. (2012) Regulation of MntH by a dual Mn(II)- and Fe(II)-dependent transcriptional repressor (DR2539) in *Deinococcus radiodurans*. *PLoS One* 7: e35057.
24. Zhu XN, Long F, Chen YH, Knochel S, She QX, et al. (2008) A Putative ABC Transporter Is Involved in Negative Regulation of Biofilm Formation by *Listeria monocytogenes*. *Appl Environ Microbiol* 74: 7675–7683.
25. Battista JR (1997) Against all odds: the survival strategies of *Deinococcus radiodurans*. *Annu Rev Microbiol* 51: 203–224.
26. White O, Eisen JA, Heidelberg JF, Hickey EK, Peterson JD, et al. (1999) Genome sequence of the radioresistant bacterium *Deinococcus radiodurans* R1. *Science* 286: 1571–1577.
27. Slade D, Radman M (2011) Oxidative stress resistance in *Deinococcus radiodurans*. *Microbiol Mol Biol Rev* 75: 133–191.
28. Liu Y, Zhou J, Omelchenko MV, Beliaev AS, Venkateswaran A, et al. (2003) Transcriptome dynamics of *Deinococcus radiodurans* recovering from ionizing radiation. *Proc Natl Acad Sci U S A* 100: 4191–4196.
29. Aguirre JD, Clark HM, McIlvin M, Vazquez C, Palmere SL, et al. (2013) A manganese-rich environment supports superoxide dismutase activity in a Lyme disease pathogen, *Borrelia burgdorferi*. *J Biol Chem* 288: 8468–8478.
30. Gilbreath JJ, Pich OQ, Benoit SL, Besold AN, Cha JH, et al. (2013) Random and site-specific mutagenesis of the *Helicobacter pylori* ferric uptake regulator provides insight into Fur structure-function relationships. *Mol Microbiol* 89: 304–323.
31. Banh A, Chavez V, Doi J, Nguyen A, Hernandez S, et al. (2013) Manganese (Mn) oxidation increases intracellular Mn in *Pseudomonas putida* GB-1. *PLoS One* 8: e77835.
32. Gutteridge JM, Bannister JV (1986) Copper + zinc and manganese superoxide dismutases inhibit deoxyribose degradation by the superoxide-driven Fenton reaction at two different stages. Implications for the redox states of copper and manganese. *Biochem J* 234: 225–228.
33. Anjem A, Inlay JA (2012) Mononuclear iron enzymes are primary targets of hydrogen peroxide stress. *J Biol Chem* 287: 15544–15556.
34. Moody MD, Dailey HA (1985) Iron transport and its relation to heme biosynthesis in *Rhodospseudomonas sphaeroides*. *J Bacteriol* 161: 1074–1079.
35. Funayama T, Narumi I, Kikuchi M, Kitayama S, Watanabe H, et al. (1999) Identification and disruption analysis of the recN gene in the extremely radioresistant bacterium *Deinococcus radiodurans*. *Mutat Res* 435: 151–161.
36. Gao GJ, Lu HM, Huang LF, Hua YJ (2005) Construction of DNA damage response gene ppri function-deficient and function-complementary mutants in *Deinococcus radiodurans*. *Chinese Science Bulletin* 50: 311–316.
37. Jiao J, Wang L, Xia W, Li M, Sun H, et al. (2012) Function and biochemical characterization of RecJ in *Deinococcus radiodurans*. *DNA Repair (Amst)* 11: 349–356.
38. Srinivasan VB, Vaidyanathan V, Mondal A, Venkataramaiah M, Rajamohan G (2012) Functional characterization of a novel Mn<sup>2+</sup> dependent protein serine/threonine kinase KpnK, produced by *Klebsiella pneumoniae* strain MGH78578. *FEBS Lett* 586: 3778–3786.
39. King KY, Horenstein JA, Caparon MG (2000) Acrotolerance and peroxide resistance in peroxidase and PerR mutants of *Streptococcus pyogenes*. *J Bacteriol* 182: 5290–5299.
40. Sun H, Xu G, Zhan H, Chen H, Sun Z, et al. (2010) Identification and evaluation of the role of the manganese efflux protein in *Deinococcus radiodurans*. *Bmc Microbiology* 10: 319.
41. Hua Y, Narumi I, Gao G, Tian B, Satoh K, et al. (2003) Ppri: a general switch responsible for extreme radioresistance of *Deinococcus radiodurans*. *Biochem Biophys Res Commun* 306: 354–360.
42. Wang L, Xu G, Chen H, Zhao Y, Xu N, et al. (2008) DrRRA: a novel response regulator essential for the extreme radioresistance of *Deinococcus radiodurans*. *Mol Microbiol* 67: 1211–1222.
43. Jiao J, Wang L, Xia W, Li M, Sun H, et al. (2012) Function and biochemical characterization of RecJ in *Deinococcus radiodurans*. *DNA Repair (Amst)* 11: 349–356.
44. Ren S, Peng Z, Mao JH, Yu Y, Yin C, et al. (2012) RNA-seq analysis of prostate cancer in the Chinese population identifies recurrent gene fusions, cancer-associated long noncoding RNAs and aberrant alternative splicings. *Cell Res* 22: 806–821.
45. Trapnell C, Roberts A, Goff L, Pertea G, Kim D, et al. (2012) Differential gene and transcript expression analysis of RNA-seq experiments with TopHat and Cufflinks. *Nat Protoc* 7: 562–578.
